# Supplementary material for: Murine Anorectic Response to Deoxynivalenol (Vomitoxin) Is Sex-Dependent
Source: Toxins (Basel). 2015 Jul 29;7(8):2845–59. doi: 10.3390/toxins7082845 (PMC4549728; doi:10.3390/toxins7082845)
Supplement: Supplementary file 1 [file toxins-07-02845-s001.pdf]

## Supplementary Information

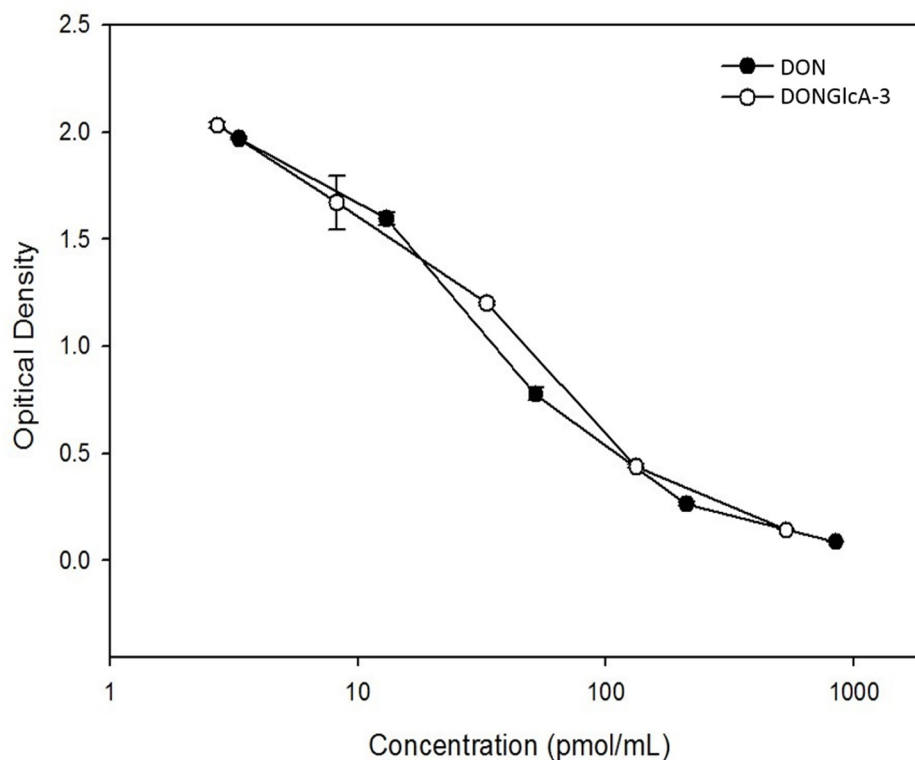

**Figure S1.** DONGlcA-3 is completely cross-reactive with DON Veratox high sensitivity (hs) ELISA. The DON Veratox hs ELISA is a direct competitive ELISA using Four Parameter Logistic curve-fitting analysis. The *x*-axis is logistic and the *y*-axis is linear. Data are mean  $\pm$  SEM ( $n = 2$  rep). DONGlcA-3 is the major metabolite formed in rat liver. Cross reactivity with other potential glucuronides was not determined. Since we did not measure ratio of active vs. conjugated DON, results in manuscript are reported as DON equivalents.

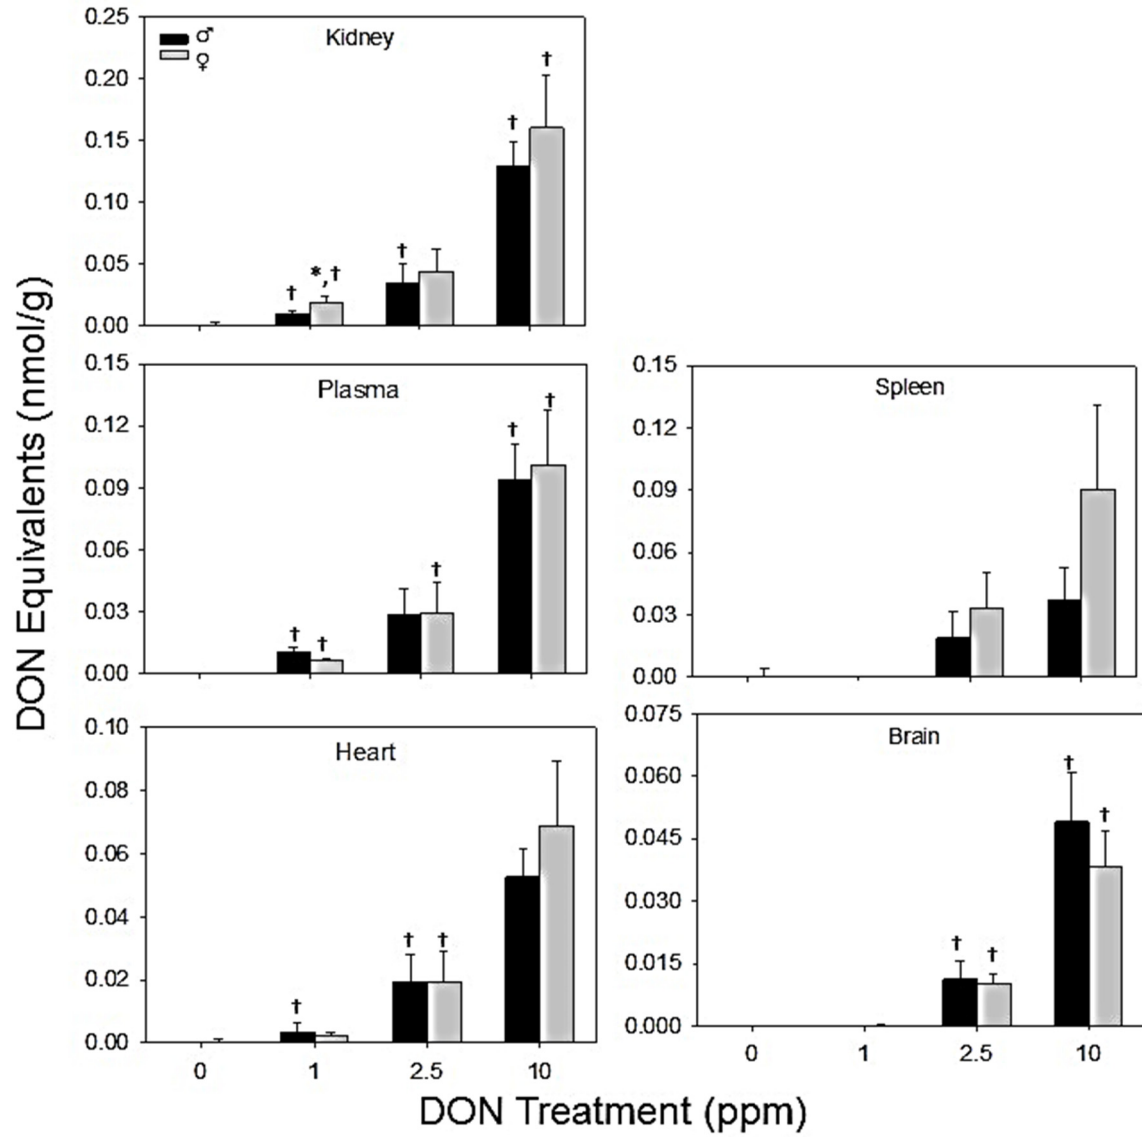

**Figure S2.** Organ DON equivalents increased dose dependently after dietary DON exposure in mice. Data are mean  $\pm$  SEM ( $n = 6/\text{gp}$ ). Asterisk indicates statistical significance from male on same treatment diet and dagger indicates significance from preceding treatment dose within sex ( $p < 0.05$ ).
